# Supplementary material
Source: PubMed Central journal article supplement (PMC3490602)
Supplement: supp_pp.112.204552_204552Fig._S1.pdf [file supp_pp.112.204552_204552Fig._S1.pdf]

Fig. S1

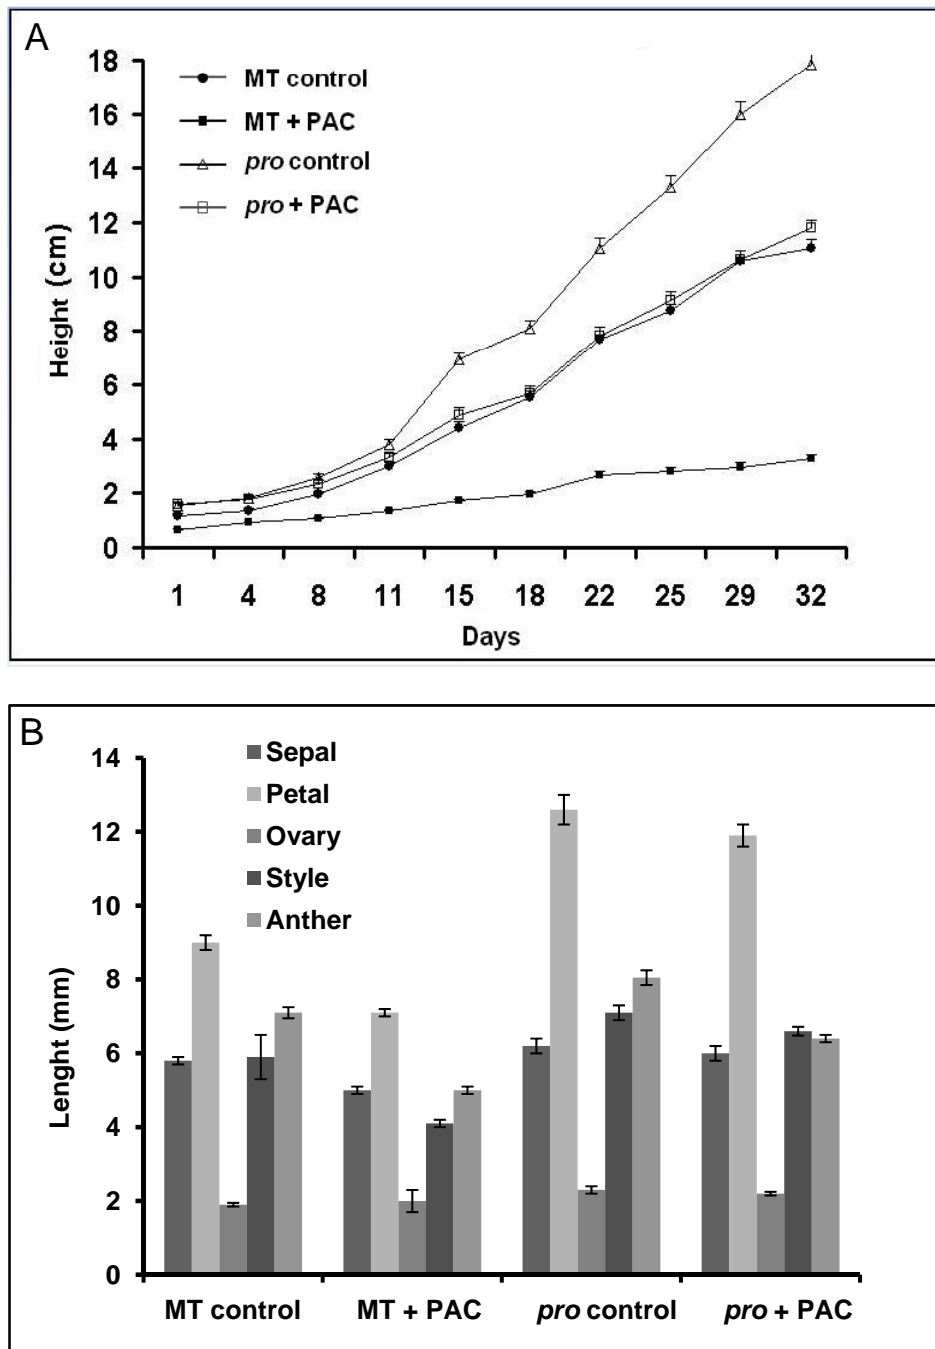

**Figure S1.** (A) Effect of PAC on growth of WT and *pro* plants (n = 12 plants). (B) Effect of GA<sub>3</sub> and PAC on growth of flower organs at anthesis (n = 10 flowers from different plants). The plants were sprayed with PAC (10<sup>-4</sup> M) and GA<sub>3</sub> (10<sup>-4</sup> M) solutions during 4 consecutive weeks after germination.
