# Supplementary material
Source: PubMed Central journal article supplement (PMC3490602)
Supplement: supp_pp.112.204552_204552Fig._S2.pdf [file supp_pp.112.204552_204552Fig._S2.pdf]

Fig. S2

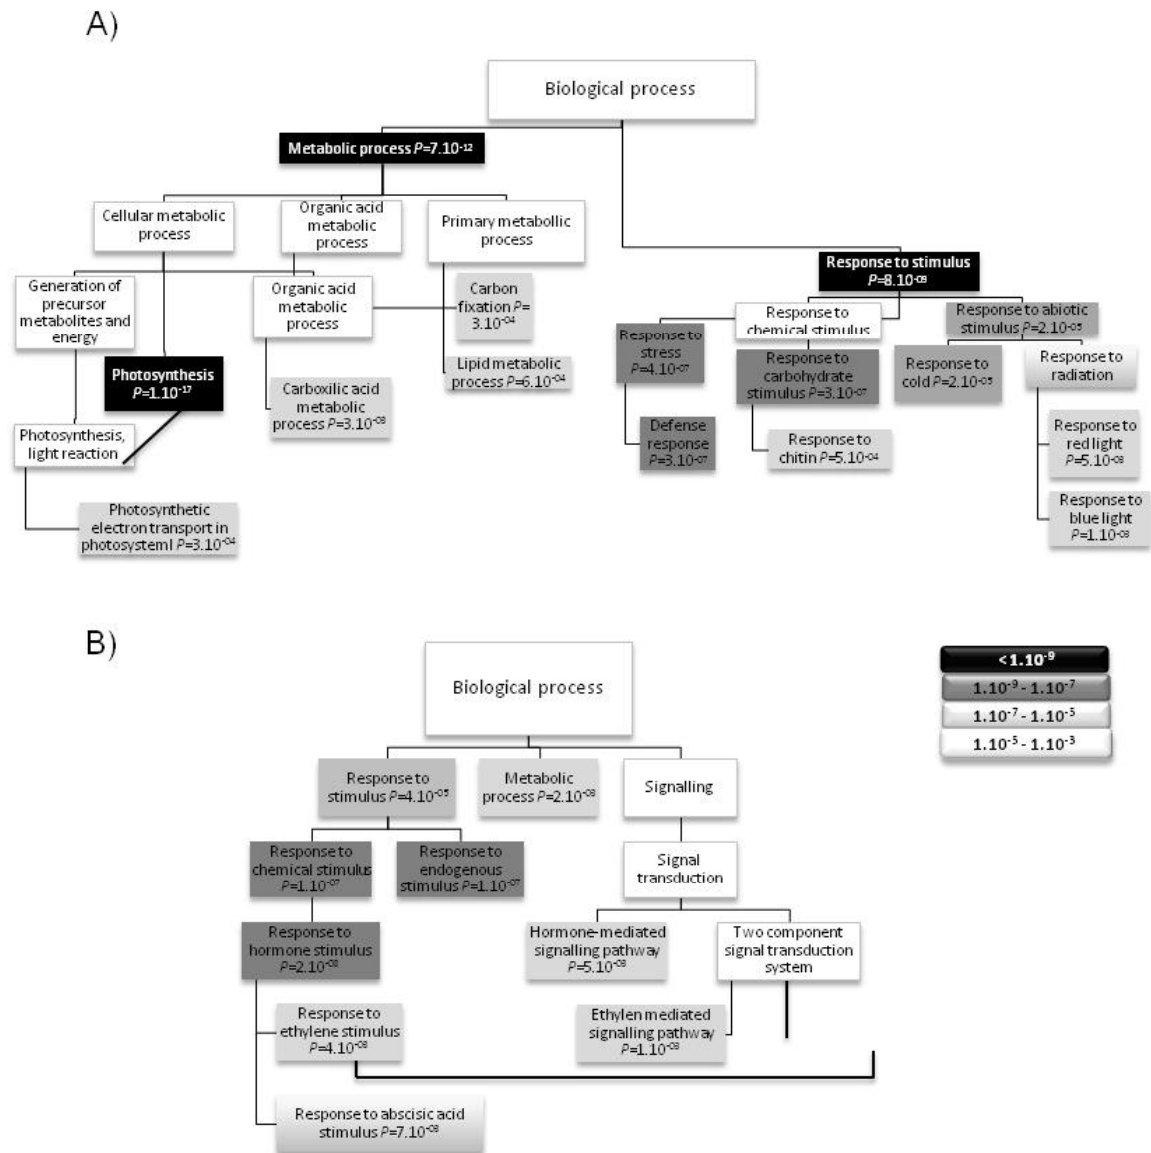

B)

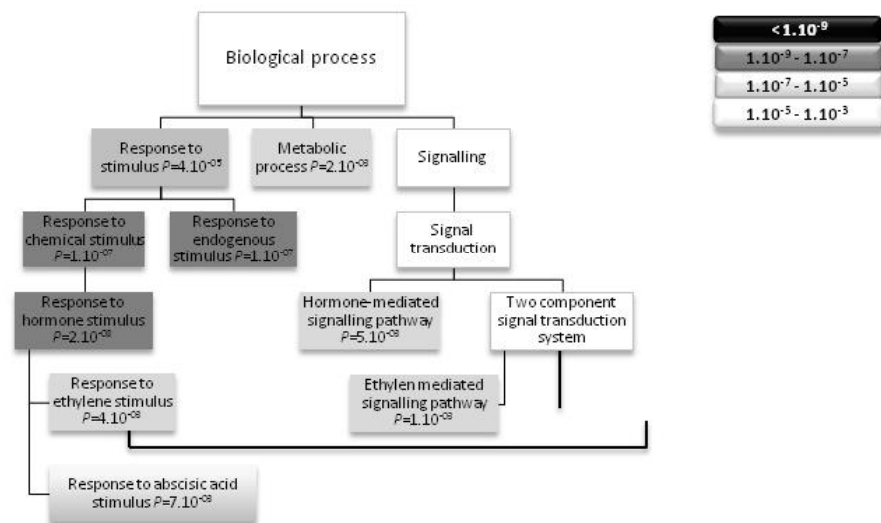

**Figure S2.** Hierarchical view of GO Biological Processes categories overrepresented with up-regulated (A) and down-regulated (B) genes. Significant categories ( $P$ -value from Fisher's exact test corrected for multiple hypothesis testing  $<0.05$ ) are shown using a gray colour scale according to their significant level. Other categories required to complete the hierarchy are also shown.
