# Supplementary material
Source: PubMed Central journal article supplement (PMC3490602)
Supplement: supp_pp.112.204552_204552Fig._S4.pdf [file supp_pp.112.204552_204552Fig._S4.pdf]

Fig. S4

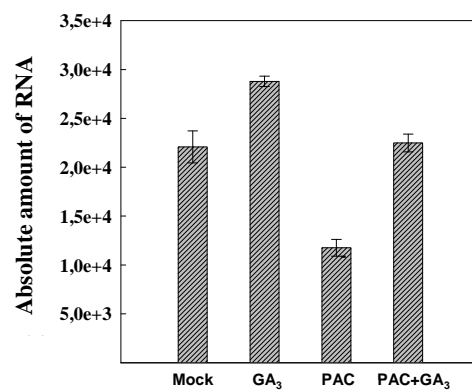

**Figure S4.** Effect of GA<sub>3</sub> and PAC on *SIDE* expression in 7-d-old WT seedlings. The seedlings were grown in Petri dishes with solidified medium control (mock) or containing 10<sup>-5</sup> M GA<sub>3</sub> or 10<sup>-5</sup> M PAC. PAC, paclobutrazol. Absolute amount of RNA means molecules of RNA/ng total RNA.
