# Supplementary material
Source: PubMed Central journal article supplement (PMC3490602)
Supplement: supp_pp.112.204552_204552Fig._S5.pdf [file supp_pp.112.204552_204552Fig._S5.pdf]

Fig. S5

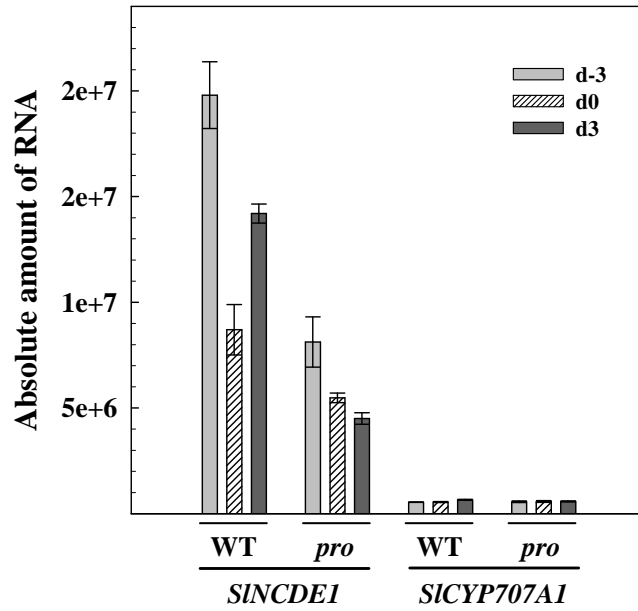

**Figure S5.** Transcript levels of ABA metabolism genes (*SINCD1* and *SICYP107A1*) in unpollinated WT and *pro* ovaries between d-3 and d3. Absolute amount of RNA means molecules of RNA/ng total RNA.
