# Supplementary material
Source: PubMed Central journal article supplement (PMC3490602)
Supplement: supp_pp.112.204552_204552Table_S1.pdf [file supp_pp.112.204552_204552Table_S1.pdf]

**Table S1.** Effect of GA<sub>3</sub> and 2,4-D application to unpollinated WT and *pro* ovaries on fruit-set and growth (g/fruit). GA<sub>3</sub> (2000 ng) and 2,4-D (200 ng) were applied to ovaries from emasculated flowers, and fruits collected at d20. Values are means  $\pm$  SE of 25 treated ovaries. Statistical significance of mean differences was analysed using *t*-test: \*,  $P < 0.05$ ; \*\*,  $P < 0.01$ ; NS, not significant.

| Treatment                           | WT            | <i>procera</i>   |
|-------------------------------------|---------------|------------------|
| Intact flowers<br>(self-pollinated) | 4.7 $\pm$ 0.4 | 3.4 $\pm$ 0.3 *  |
| Emasculated flowers:                |               |                  |
| Mock                                | -             | 3.0 $\pm$ 0.2    |
| + GA <sub>3</sub>                   | 3.2 $\pm$ 0.2 | 3.2 $\pm$ 0.3 NS |
| + 2,4-D                             | 8.1 $\pm$ 0.4 | 6.3 $\pm$ 0.4 ** |
