# Supplementary material
Source: PubMed Central journal article supplement (PMC3490602)
Supplement: supp_pp.112.204552_204552Table_S10.pdf [file supp_pp.112.204552_204552Table_S10.pdf]

**Table S10.** Primers used for qPCR.

| <b>Gene</b>              | <b>Gene Bank ID</b> | <b>Forward Primer (5'→3')</b> | <b>Reverse Primer (5'→3')</b> |
|--------------------------|---------------------|-------------------------------|-------------------------------|
| <b><i>Style2.1</i></b>   | EU161281            | GAAGGTCGAGGCAATCATCAACAG      | GTCGATCACTAAGATCATCCACTTG     |
| <b><i>SIcycB2.1</i></b>  | AJ243455            | GTGGAAACAAGAAGCAACCGAA        | TGCATATTTCTCGTGATTGGTC        |
| <b><i>SIcycD3.1</i></b>  | AJ245415            | TTTAGATTCCCAGCTCCAAAATCCTA    | TTCATTTCCGACATCTAAACTAGACC    |
| <b><i>SICDKB2.1</i></b>  | AJ297917            | TGGTGTATTGCACAGGGATCTGAAA     | ACTTCTTAATGGGCAGAGTATAAGC     |
| <b><i>SIXTH1</i></b>     | D16456              | TGGGCTAGTCACCATATTAAGTTC      | CTCTGCATTATTCGATGACAGGT       |
| <b><i>SIXTH9</i></b>     | AY497479            | CTAATGAGTATCCAATTACTAGCCTCAG  | GAAAGTTTATCAAGCGATAGGGCAA     |
| <b><i>SIEXP5</i></b>     | AF059489            | CAAAATTGGCAGAATAACGCTTACC     | AGAAGTAGGAGCTGCATTGTATGAAA    |
| <b><i>SIEXP18</i></b>    | AJ004997            | ATTGGATAAGTATGAGCAGGAAGTGG    | ATGAAGTAGAGCTCCTTCTATCACC     |
| <b><i>SIDELLA</i></b>    | AY269087            | TGATGCGACTATACTTGATATAAG      | GGGTTAATCTGTTTAATAGAGTTC      |
| <b><i>SIIAA9</i></b>     | AJ937282            | TCTACTGGCTTCTTCAACTTC         | CAGATAGACCCATATAGTTTTCG       |
| <b><i>SIARF7</i></b>     | EF121545            | CTGTCTAAGTACAAAGGCAATAA       | GAAGGTAGAATGTTCCTAGAATG       |
| <b><i>SIcyp707A1</i></b> | EU183406            | CTGAACAGAAAGTTATTTGGCAGTC     | ATGATACTAGCCATTCTCAGTGTCTC    |
| <b><i>SINCDE1</i></b>    | AJ439079            | TTCAAGCTCCACCTATACTTC         | TTTGGGTGTGAAATTGTATTA         |
